# Supplementary material for: Clinical value of prenatal screening markers in early pregnancy combined with perinatal characteristics to predict fetal growth restriction
Source: PubMed Central journal article supplement — Transl Pediatr. 2024 Jul 29;13(7):1071–85. doi: 10.21037/tp-24-58 (PMC11319999; doi:10.21037/tp-24-58), 2024-07-29
Supplement: tp-13-07-1071-dss.pdf [file tp-13-07-1071-dss.pdf]

## Data Sharing Statement

|                     |                                                                                                                                                     |                                                                                                                                        |
|---------------------|-----------------------------------------------------------------------------------------------------------------------------------------------------|----------------------------------------------------------------------------------------------------------------------------------------|
| <b>Article Info</b> | <a href="https://dx.doi.org/10.21037/tp-24-58">https://dx.doi.org/10.21037/tp-24-58</a>                                                             |                                                                                                                                        |
| <b>Item</b>         | <b>Question</b>                                                                                                                                     | <b>Authors' Response<br/>(place "-" if not applicable)</b>                                                                             |
| 1                   | Would you like to share data collected for your study to others?                                                                                    | Yes                                                                                                                                    |
| 2                   | If not, would you like to share the reason for your decision?                                                                                       | -                                                                                                                                      |
| 3                   | What data in particular will be shared?                                                                                                             | The detailed data of FGR group ( $n=90$ ) and Non-FGR ( $n=350$ ) in particular will be shared, we will send it back as an attachment. |
| 4                   | Any other documents will be shared? Such as study protocol, statistical analysis plan, informed consent form, clinical study report, analytic code. | -                                                                                                                                      |
| 5                   | When will data availability begin?                                                                                                                  | From the publication date.                                                                                                             |
| 6                   | When will data availability end?                                                                                                                    | Three years within the publication date, since the improvement of obstetrics and gynecology technology and daily health care.          |
| 7                   | To whom will you share the data?                                                                                                                    | Prenatal Screening Expert                                                                                                              |
| 8                   | For what type of analysis or purpose?                                                                                                               | Fetal growth restriction                                                                                                               |
| 9                   | How or where can the data/documents be obtained?                                                                                                    | Emails could be sent to the address below to obtain the shared data:<br><a href="mailto:cxy40344@163.com">cxy40344@163.com</a>         |
| 10                  | Any other restrictions?                                                                                                                             | We may balance the potential benefits and risks for each request and then provide the data that could be shared.                       |
